# Supplementary material for: Abrasion of sedimentary rocks as a source of hydrogen peroxide and nutrients to subglacial ecosystems
Source: Copernicus journal article supplement (doi:10.5194/egusphere-2022-908), 2022-10-05
Supplement: Supplementary file 1 [file egusphere-2022-908-supplement.pdf]

**Supplementary A: Acetate concentration in solution, normalized to grams of sample in incubation experiments plotted against potential contributing variables**

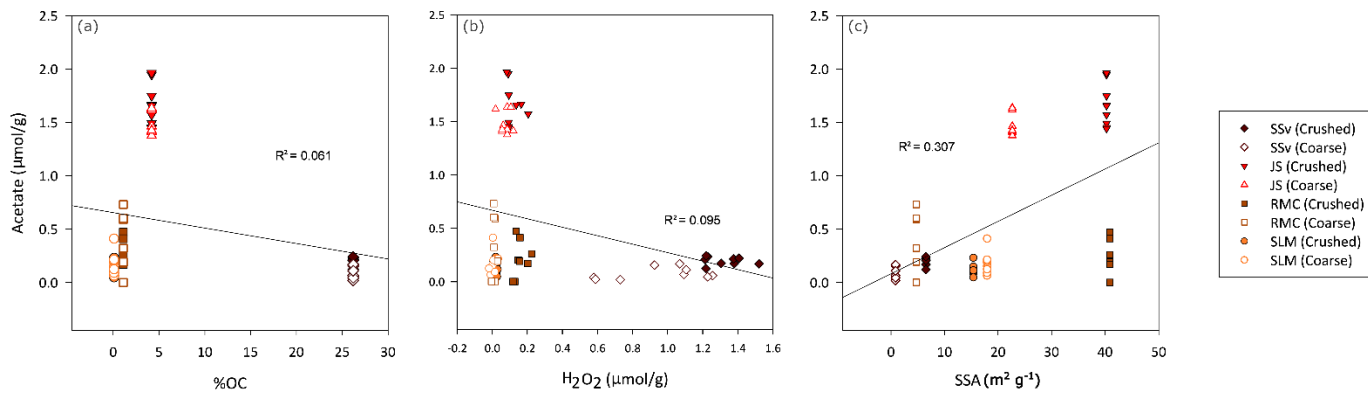

**Figure S1 Relationships between acetate concentration ( $\mu\text{mol}$ ) produced per gram of crushed and coarse samples relative to (a) organic carbon (OC), (b)  $\text{H}_2\text{O}_2$  and (c) specific surface area (SSA). The concentration of  $\text{H}_2\text{O}_2$  measured in solution was normalised to gram of sample.**

**Supplementary B: Calculations to estimate potential  $\text{NH}_4^+$  contribution to Robertson Glacier and Longyearbreen subglacial systems**

Calculations to estimate daily  $\text{NH}_4^+$  contributions are based on Macdonald et al. (2018), using the following equation:

$$\text{Daily } \text{NH}_4^+ \text{ production (catchment)} = \frac{((\mu\text{mol } \text{NH}_4^+ \text{ g}^{-1}) \times (\text{flux suspended sediment (SS) } \text{g a}^{-1}))}{(\text{glaciated area } \text{m}^2) \times (365)}$$

This is a first order estimate, and will likely overestimate the actual amount, since it assumes all the suspended sediment is of the rock type used for our incubation experiments.

No suspended sediment flux has been measured for Mercer Subglacial Lake (SLM) and thus these calculations were not extended to the SLM samples.

| Catchment         | Flux SS ( $\text{g a}^{-1}$ ) | Area ( $\text{km}^2$ ) | Daily $\text{NH}_4^+$ production $\mu\text{mol m}^{-2} \text{day}^{-1}$ for glaciated area of catchment | Daily $\text{NH}_4^+$ demand $\mu\text{mol m}^{-2} \text{day}^{-1}$ for glaciated area of catchment |
|-------------------|-------------------------------|------------------------|---------------------------------------------------------------------------------------------------------|-----------------------------------------------------------------------------------------------------|
| Robertson Glacier | $3 \times 10^8$               | 1.4                    | 3.5                                                                                                     | 0.2                                                                                                 |
| Longyearbreen     | $15 \times 10^8$              | 2.5                    | 4.7                                                                                                     | * 0.2                                                                                               |

\* = Published estimates for  $\text{NH}_4^+$  demand by subglacial microbes at Longyearbreen or nearby locations are not available in the literature to the best of the authors' knowledge, thus '0.2' was used for illustrative purposes.

----

Calculations:

**Robertson Muddy Carbonate RMC** - Suspended sediment flux ( $300 \text{ t km}^{-2} \text{ yr}^{-1}$ ) and area ( $1.4 \text{ km}^2$ ) of Robertson Glacier taken from Macdonald et al. (2018)

$$\text{NH}_4^+ \text{ m}^{-2} \text{ day} = 6.0 \times 3 \times 10^8 / 1.4 \times 1000000 \times 365$$

$$\text{RMC} = 3.5 \mu\text{mol } \text{NH}_4^+ \text{ m}^{-2} \text{ day}$$

$\text{NH}_4^+$  demand can be calculated using same equation, but substituting the N oxidation values from Boyd et al. (2011) =  $0.28 \mu\text{mol N gdws}^{-1} \text{ day}^{-1}$ . (gdws = grams dry weight sediment)

$$\text{First convert N to } \text{NH}_4^+: 0.28 \times (18.0383/14.0067) = 0.36 \mu\text{mol } \text{NH}_4^+ \text{ gdws}^{-1} \text{ day}^{-1}.$$

Since the  $\text{NH}_4^+$  demand is already a daily value, then it is only necessary to divide the annual suspended sediment flux by 365 to produce a daily flux, rather than multiply the area by 365.

$$\begin{aligned} &= (0.36 \times (3 \times 10^8 / 365)) / 1.4 \times 1000000 \\ &= \underline{0.2 \mu\text{mol NH}_4^+ \text{ m}^{-2} \text{ day}} \end{aligned}$$

**SSv** - Longyearbreen suspended sediment ( $1500 \text{ t km}^{-2} \text{ yr}^{-1}$ ) and area ( $2.5 \text{ km}^2$  in 1990) values from Etzelmüller et al. (2000)

$$\text{NH}_4^+ \text{ m}^{-2} \text{ day} = 2.9 \times 15 \times 10^8 / 2.5 \times 1000000 \times 365$$

$$\text{SSv} = \underline{4.7 \mu\text{mol NH}_4^+ \text{ m}^{-2} \text{ day}}$$

Since the  $\text{NH}_4^+$  demand is already a daily value, then it is only necessary to divide the annual suspended sediment flux by 365 to produce a daily flux, rather than multiply the area by 365.

$$\begin{aligned} &= (0.36 \times (15 \times 10^8 / 365)) / 2.5 \times 1000000 \\ &= \underline{0.6 \mu\text{mol NH}_4^+ \text{ m}^{-2} \text{ day}} \end{aligned}$$

### **Supplementary References**

- Boyd, E. S., Lange, R. K., Mitchell, A. C., Havig, J. R., Hamilton, T. L., Lafrenière, M. J., Shock, E. L., Peters, J. W., and Skidmore, M.: Diversity, Abundance, and Potential Activity of Nitrifying and Nitrate-Reducing Microbial Assemblages in a Subglacial Ecosystem, *77*, 4778-4787, 10.1128/AEM.00376-11, 2011.
- Etzelmueller, B., Ødegård, R. S., Vatne, G., Mysterud, R. S., Tønning, T., and Sollid, J. L.: Glacier characteristics and sediment transfer system of Longyearbreen and Larsbreen, western Spitsbergen, *Norsk Geografisk Tidsskrift - Norwegian Journal of Geography*, *54*, 157-168, 10.1080/002919500448530, 2000.
- Macdonald, M. L., Wadham, J. L., Telling, J., and Skidmore, M. L.: Glacial Erosion Liberates Lithologic Energy Sources for Microbes and Acidity for Chemical Weathering Beneath Glaciers and Ice Sheets, *Front. Earth Sci.*, *6*, 15, 10.3389/feart.2018.00212, 2018.
